# Supplementary material for: Treatments, prognostic factors, and genetic heterogeneity in advanced cholangiocarcinoma: A multicenter real‐world study
Source: PubMed Central journal article supplement (PMC10923031; doi:10.1002/cam4.6892), 2024-03-08
Supplement: CAM4-13-e6892-s001.pdf [file CAM4-13-e6892-s001.pdf]

Supplementary File 1. List of metastatic sites in all patients.

| <b>Patient_ID</b> | <b>Metastatic_sites</b>        |
|-------------------|--------------------------------|
| 1                 | Peritoneum                     |
| 2                 | Liver                          |
| 3                 | Liver, lungs                   |
| 4                 | Liver                          |
| 5                 | Liver                          |
| 6                 | Liver                          |
| 7                 | Lungs, peritoneum, bone        |
| 8                 | Liver                          |
| 9                 | Liver                          |
| 10                | Liver, peritoneum              |
| 11                | Liver                          |
| 12                | Liver, lymphnodes              |
| 13                | Lungs, bone, lymphnodes        |
| 14                | Liver                          |
| 15                | Liver, lymphnodes              |
| 16                | Liver, bone                    |
| 17                | Liver, peritoneum              |
| 18                | Liver, peritoneum              |
| 19                | Liver, lungs, peritoneum       |
| 20                | Liver, peritoneum              |
| 21                | Liver                          |
| 22                | Liver, peritoneum              |
| 23                | Liver, lungs, bone, lymphnodes |
| 24                | Liver                          |
| 25                | Liver, adrenal gland           |
| 26                | Liver, peritoneum              |
| 27                | Liver, lungs, peritoneum       |

| <b>Patient_ID</b> | <b>Metastatic_sites</b>                     |
|-------------------|---------------------------------------------|
| 28                | Liver                                       |
| 29                | Liver, lymphnodes                           |
| 30                | Liver, peritoneum, bone                     |
| 31                | Liver, lungs, bone                          |
| 32                | Liver                                       |
| 33                | Liver                                       |
| 34                | Liver                                       |
| 35                | Liver, lungs, bone                          |
| 36                | Liver, lungs, lymphnodes                    |
| 37                | Liver, lungs, brain                         |
| 38                | Liver, lungs, lymphnodes                    |
| 39                | Liver, lymphnodes                           |
| 40                | Liver, peritoneum                           |
| 41                | Liver                                       |
| 42                | Lungs, bone, lymphnodes                     |
| 43                | Liver                                       |
| 44                | Liver, lungs                                |
| 45                | Liver, bone                                 |
| 46                | Liver, lungs, lymphnodes                    |
| 47                | Liver, peritoneum, lymphnodes               |
| 48                | Liver                                       |
| 49                | Liver, peritoneum, lymphnodes, bone, uterus |
| 50                | Liver, lymphnodes                           |
| 51                | Liver                                       |
| 52                | Liver, lymphnodes                           |
| 53                | Liver, lymphnodes                           |
| 54                | Liver, lymphnodes                           |

## **Patient\_ID Metastatic\_sites**

|    |                               |
|----|-------------------------------|
| 55 | Liver                         |
| 56 | Liver, peritoneum             |
| 57 | Liver, lymphnodes             |
| 58 | Liver, lungs, lymphnodes      |
| 59 | Liver                         |
| 60 | Liver, lungs, peritoneum      |
| 61 | Liver, peritoneum             |
| 62 | Lymphnodes                    |
| 63 | Liver, peritoneum, lymphnodes |
| 64 | Liver, lungs, lymphnodes      |
| 65 | Liver, lungs, peritoneum      |
| 66 | Liver, peritoneum, lymphnodes |
| 67 | Liver, peritoneum, lymphnodes |
| 68 | Liver                         |
| 69 | Lymphnodes                    |
| 70 | Liver, lymphnodes             |
| 71 | Liver, lungs                  |
| 72 | Liver                         |
| 73 | Liver, peritoneum             |
| 74 | Liver, peritoneum             |
| 75 | Liver, peritoneum             |
| 76 | Liver                         |
| 77 | Liver, bone, peritoneum       |
| 78 | Liver, lungs                  |
| 79 | Liver, lungs, lymphnodes      |
| 80 | Liver, peritoneum             |
| 81 | Liver                         |

| <b>Patient_ID</b> | <b>Metastatic_sites</b>          |
|-------------------|----------------------------------|
| 82                | Liver, peritoneum                |
| 83                | Liver                            |
| 84                | Liver                            |
| 85                | Lymphnodes                       |
| 86                | Peritoneum                       |
| 87                | Liver                            |
| 88                | Pancreas                         |
| 89                | Liver, pancreas, kidney          |
| 90                | Liver, peritoneum                |
| 91                | Liver, lungs, lymphnodes         |
| 92                | Liver, lymphnodes                |
| 93                | Liver, lungs                     |
| 94                | Liver, lungs, lymphnodes, spleen |
| 95                | Liver, lymphnodes                |
| 96                | Liver                            |
| 97                | Peritoneum                       |
| 98                | Peritoneum                       |
| 99                | Lungs, peritoneum, lymphnodes    |
| 100               | Liver, lungs, peritoneum         |
| 101               | Liver, lungs                     |
| 102               | Liver, lungs                     |
| 103               | Liver, lungs                     |
| 104               | Liver                            |
| 105               | Liver                            |
| 106               | Liver                            |
| 107               | Liver                            |
| 108               | Liver                            |

| <b>Patient_ID</b> | <b>Metastatic_sites</b>              |
|-------------------|--------------------------------------|
| 109               | Liver, lungs                         |
| 110               | Liver                                |
| 111               | Liver                                |
| 112               | Liver, lungs, lymphnodes, peritoneum |
| 113               | Liver                                |
| 114               | Liver, lungs, lymphnodes             |
| 115               | Peritoneum                           |
| 116               | Lungs, lymphnodes                    |
| 117               | Peritoneum                           |
| 118               | Liver                                |
| 119               | Liver, lymphnodes                    |
| 120               | Liver, lungs                         |
