# Supplementary material for: Treatments, prognostic factors, and genetic heterogeneity in advanced cholangiocarcinoma: A multicenter real‐world study
Source: PubMed Central journal article supplement (PMC10923031; doi:10.1002/cam4.6892), 2024-03-08
Supplement: CAM4-13-e6892-s002.pdf [file CAM4-13-e6892-s002.pdf]

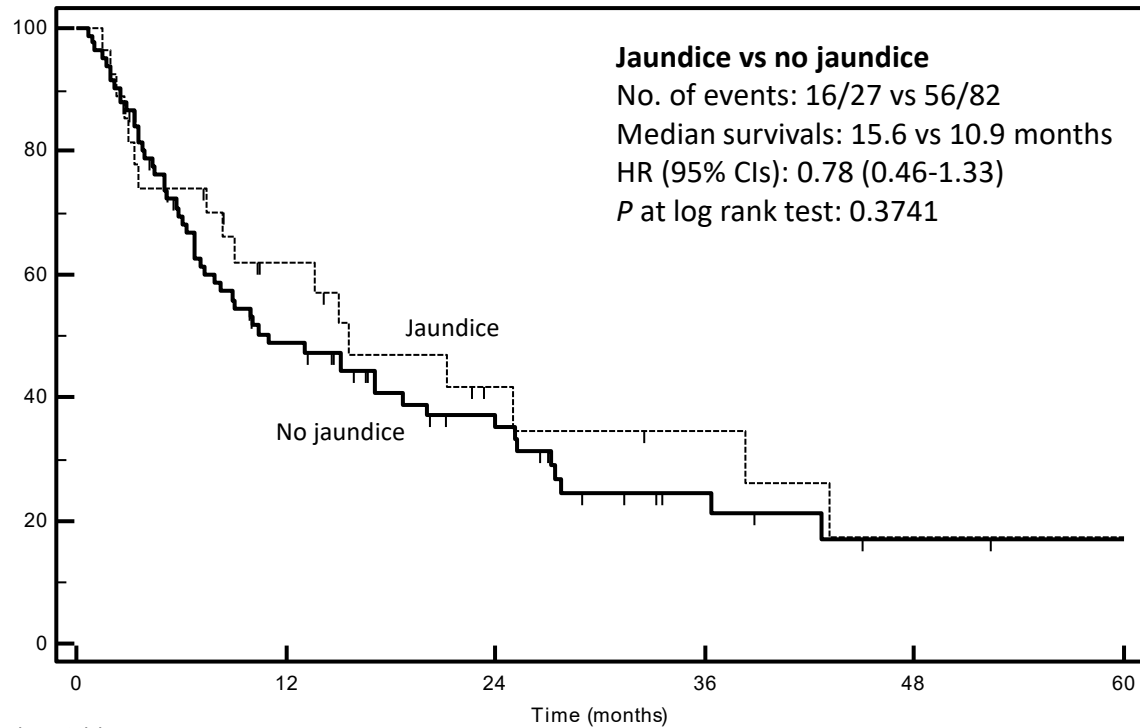

| Number at risk       | 0  | 12 | 24 | 36 | 48 | 60 |
|----------------------|----|----|----|----|----|----|
| Group: 0 No jaundice | 82 | 34 | 18 | 7  | 3  | 2  |
| Group: 1 Jaundice    | 27 | 13 | 6  | 4  | 2  | 2  |

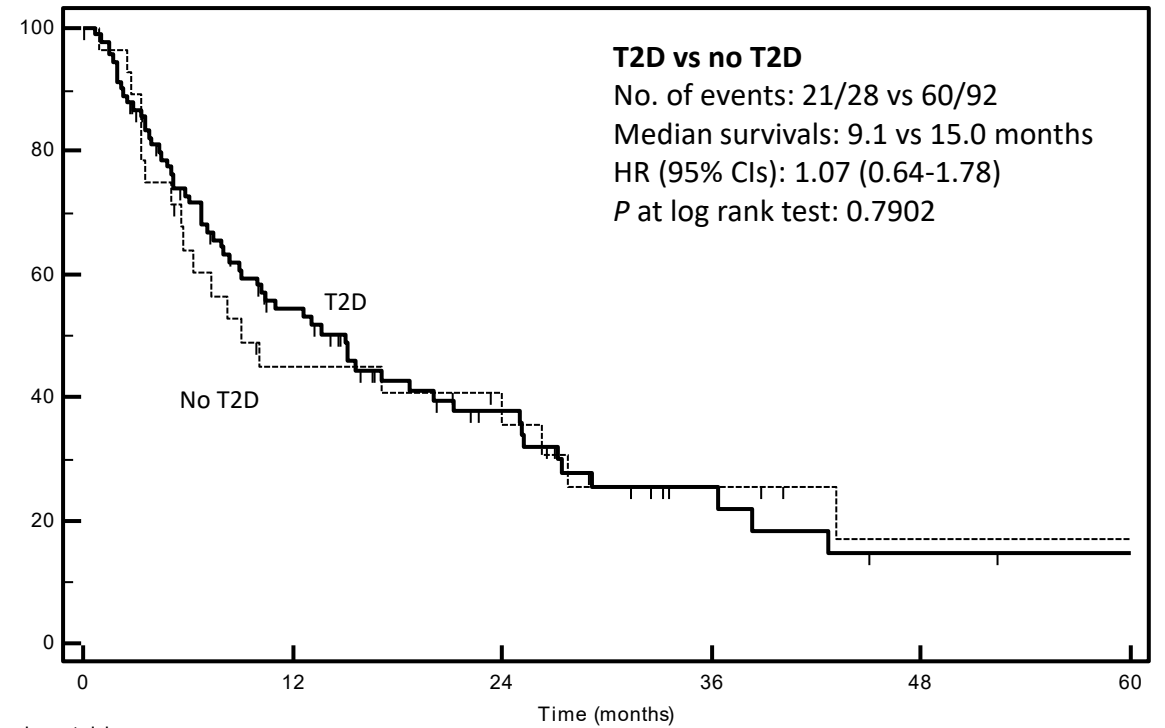

| Number at risk  | 0  | 12 | 24 | 36 | 48 | 60 |
|-----------------|----|----|----|----|----|----|
| Group: 0 No T2D | 91 | 41 | 20 | 7  | 3  | 2  |
| Group: 1 T2D    | 28 | 11 | 7  | 5  | 2  | 2  |

**Supplementary File 1.** The Kaplan-Meier survival curves for the clinical cohort are depicted based on the presence or absence of jaundice at the onset of CCA and the presence or absence of type 2 diabetes (T2D). The figures include median survival times, Hazard Ratios (HR) with associated Confidence Intervals (CIs), and p-values derived from the Log Rank test. Information regarding the onset of jaundice was unavailable for 11 patients, and the presence or absence of diabetes was not reported for 1 patient.
